# Supplementary material for: Properties of Adenovirus Vectors with Increased Affinity to DSG2 and the Potential Benefits of Oncolytic Approaches and Gene Therapy
Source: MDPI journal article supplement (doi:10.3390/v14081835), 2022-08-21
Supplement: s1 [file s1]

**Table S1.** Oligonucleotides used in this study

| Name             | Sequence                                                                                                                     | Note /application                       |
|------------------|------------------------------------------------------------------------------------------------------------------------------|-----------------------------------------|
| Jo4-ccdB-fwd     | TGCCAAGTACTACAGCGTATCCATTTGTTTGTTCAAAAAAGCCCGCTC                                                                             | For JO4 vector construction             |
| Jo4-ccdB-rev     | TTTCATTATGTGTTCCCGCATTAGGAAGGCTGACACTCTCTTAAGGTAGC                                                                           |                                         |
| Jo4-roV239D*     | GCTGACTTTAGTGCAAGAGGTTTTATGCCAAGTACTACAGCGTATCCATTTGA <u><b>A</b></u><br>CCTTCCTAATGCGGGAACACATAATGAAAATTATATTTTGGTCAATGCTAC |                                         |
| Jo4-seq-f        | CTATACTTTGATGCCACTGGT                                                                                                        | JO4 sequence                            |
| FK3-PqP-fwd      | TGCCAGATAGTCGCACATC                                                                                                          | Viral genome copy number quantification |
| FK3-probe (FAM)  | TGGTCCTGAATGCTGGTCTAGCTCCAG                                                                                                  |                                         |
| FK3-PqP-rev      | GGAGGTTATGAGGGTTGCC                                                                                                          |                                         |
| hB2M-PqP-fwd     | GGAATTGATTTGGGAGAGCATC                                                                                                       | Housekeeping gene detection             |
| hB2M probe (HEX) | AGTGTGACTGGGCAGATCATCCACCTTC                                                                                                 |                                         |
| hB2M-PqP-rvs     | CAGGTCCTGGCTCTACAATTTACTAA                                                                                                   |                                         |

\*The T to A mutation in Jo4-roV239D is highlighted in bold and underlined.

**Figure S1:** Analyses of receptor expression levels on different cell lines used in this study.

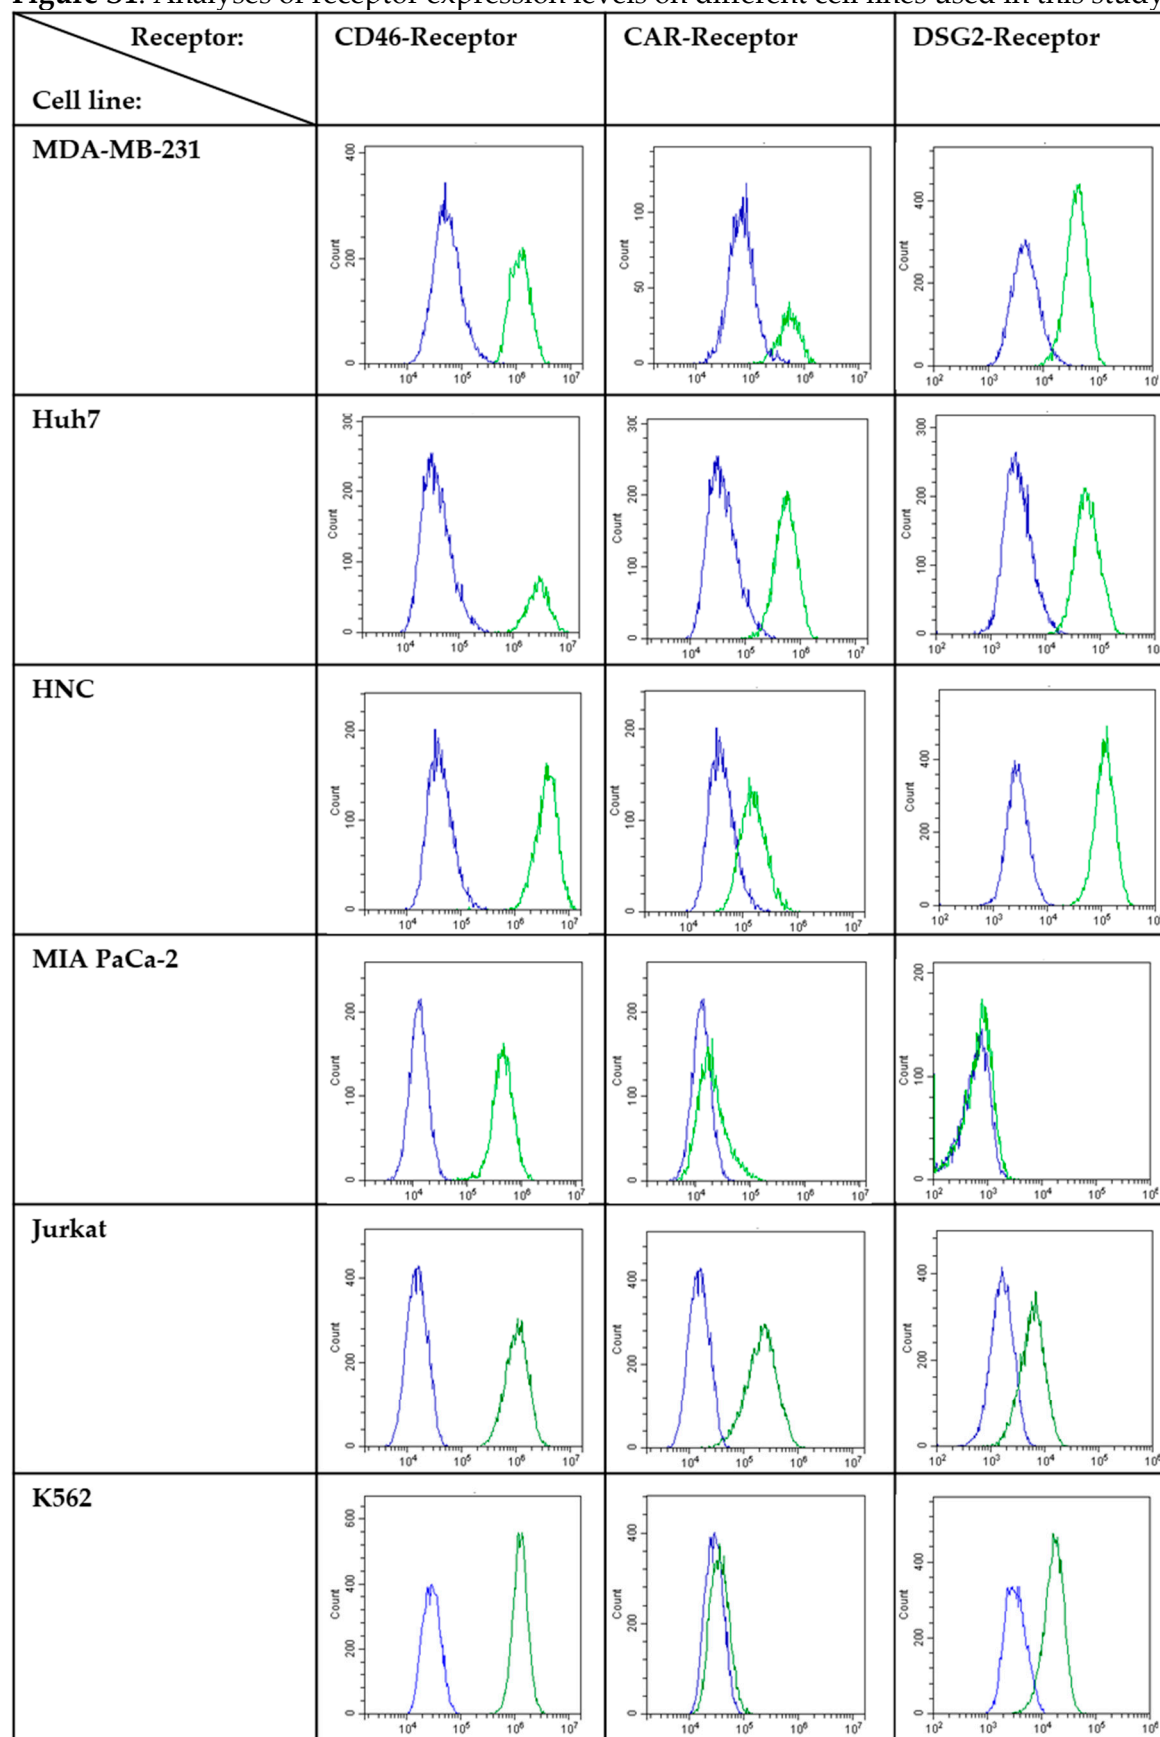

Staining of cell lines with primary adenovirus receptor antibodies (green curve).  
The blue curve shows unstained cells.

Figure S2: Analyses of receptor expression levels on the used CHO cell lines.

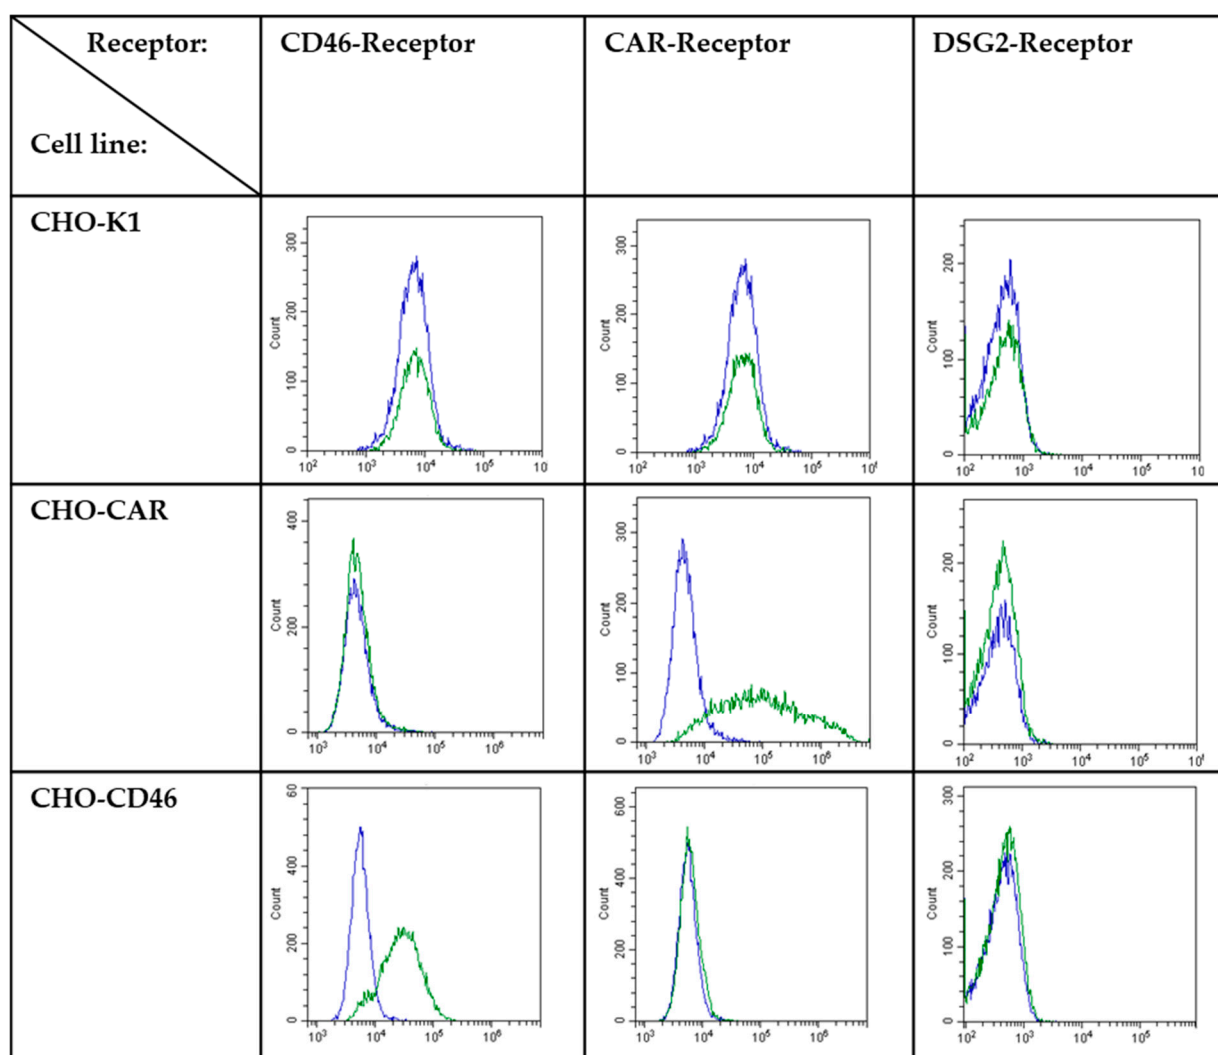

Staining of cell lines with primary adenovirus receptor antibodies (green curve).

The blue curve shows unstained cells.

Figure S3: Analyses of receptor expression levels on the used A549 cell lines.

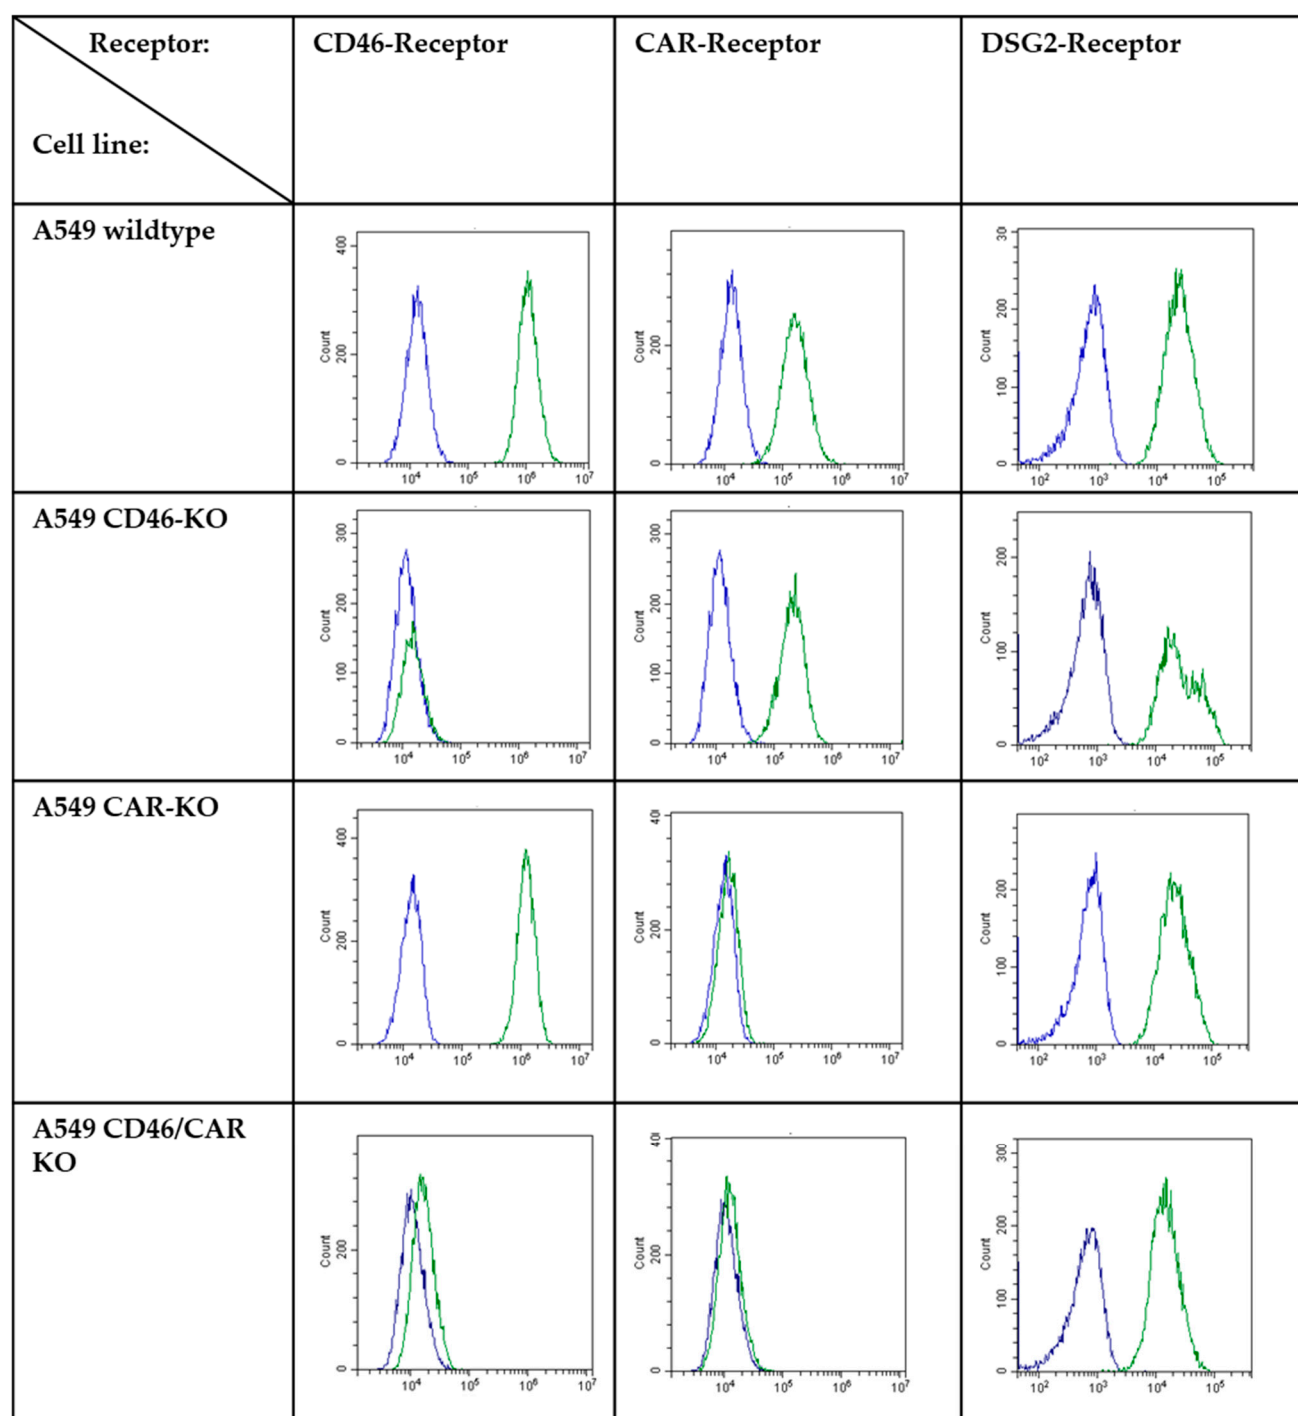

Staining of cell lines with primary adenovirus receptor antibodies (green curve).

The blue curve shows unstained cells.
